# Supplementary material for: Comparative analysis of physiological responses to environmental stress in Hedysarum scoparium and Caragana korshinskii seedlings due to roots exposure
Source: PeerJ. 2023 Feb 28;11:e14905. doi: 10.7717/peerj.14905 (PMC9983421; doi:10.7717/peerj.14905)
Supplement: Supplemental Information 2 — The original data and statistical results, including the test that was performed, the corresponding test statistic, degrees of freedom, the exact p-value and effect size. [file peerj-11-14905-s002.xlsx]

## Sheet: Primary data
		mg/g
Hedysarum scoparium	treatments	ChlA	ChlB	ChlC	ChlA/B	ChlA+B	Pro(ug/g)	SSC(ug/g)	MDA(mmol/g)	MP(（%）)	POD(U/g*min)	CAT(u/g/min)	SOD(U/g)	RV(ug/g*h)	Tr(mmol m-2 s-1)	Gs(mmol m-2 s-1)	Pn(umol m^2 S-1)	Ci(umol mol-1)
	0L	0.30502	0.106668	0.106969	2.85952	0.411688	75.0967	293.61	17.297	53.045	4.08221	12.5	76.0688	269.171	1.81403	247.658	16.3332	554.147
	0L	0.325378	0.11259	0.10658	2.88993	0.437968	69.1113	260.551	11.1312	37.6387	3.58953	6.25	96.5111	212.833	2.13837	304.894	15.3999	529.221
	0L	0.312957	0.116799	0.100622	2.67946	0.429756	58.379	343.2	15.7652	58.6622	3.51914	9.375	111.45	241.002	3.76189	647.879	5.91116	458.23
	1/4L	0.693683	0.388166	0.11054	1.78708	1.08185	109.416	210.81	16.1964	35.7496	51.5677	10	62.8993	713.615	4.80883	1105.25	54.147	550.543
	1/4L	0.684235	0.410415	0.10458	1.66718	1.09465	109.217	154.788	15.31	41.8557	51.4851	32.0833	63.2924	345.853	6.26517	1772.93	153.29	662.426
	1/4L	0.688399	0.452851	0.0797878	1.52014	1.14125	118.163	182.799	13.5878	27.2883	50.5776	21.0417	64.57	529.734	2.39512	359.707	24.8101	567.823
	1/2L	0.508704	0.166268	0.153352	3.05954	0.674972	64.9156	194.736	20.9148	36.5135	19.8595	14.1667	87.0762	239.437	3.66221	601.473	42.8695	575.762
	1/2L	0.499118	0.174636	0.13662	2.85806	0.673754	73.6562	173.771	30.0008	62.4615	19.3248	23.75	82.2604	239.437	3.66221	601.473	31.3266	540.301
	1/2L	0.502726	0.223878	0.120954	2.24554	0.726603	70.099	164.454	20.4378	72.2908	18.7137	18.9583	82.457	239.437	3.67692	604.765	31.4524	540.237
	3/4L	0.499053	0.23783	0.131594	2.09836	0.736882	57.2668	236.303	18.8334	43.4295	9.2775	13.3333	52.4816	42.2535	2.6186	379.63	18.8637	530.623
	3/4L	0.4627	0.272713	0.114581	1.69666	0.735413	51.1204	280.769	18.7326	22.794	9.2775	1.66667	53.9558	272.3	2.60816	377.768	15.2653	514.43
	3/4L	0.484787	0.265588	0.143476	1.82534	0.750375	47.3701	317.823	16.365	69.8578	9.0312	7.5	59.2629	157.277	2.60816	377.768	15.2651	514.33
Caragana korshinskii	0L	0.696992	0.324406	0.196149	2.14852	1.0214	119.557	354.688	13.8052	66.8904	79.4753	37.0833	60.344	37.5587	2.85454	435.396	3.41066	453.523
	0L	0.703869	0.314691	0.191631	2.2367	1.01856	111.578	352.52	13.7608	79.6743	88.3488	22.5	58.1818	143.975	3.3863	540.037	1.49539	441.6
	0L	0.686387	0.32763	0.193726	2.09501	1.01402	105.593	365.528	14.5684	71.3183	93.2099	29.7917	50.2211	90.7668	0.918928	113.715	8.68167	562.536
	1/4L	0.503758	0.300759	0.095355	1.67496	0.804517	114.351	546.841	19.4252	65.7143	75.8478	98.75	67.5184	136.15	2.43319	366.911	13.7932	507.95
	1/4L	0.493447	0.303893	0.095433	1.62375	0.79734	116.143	579.521	13.2938	40.5615	76.9936	66.25	54.1523	159.624	2.75065	420.041	0.599779	440.525
	1/4L	0.502269	0.287619	0.102498	1.7463	0.789888	119.129	536.938	18.2206	73.6592	85.0901	82.5	54.0541	147.887	3.02921	506.76	6.34595	462.691
	1/2L	0.40051	0.0722228	0.122707	5.54548	0.472733	112.513	393.809	20.7078	50.8682	65.1709	93.75	57.887	34.4288	3.80298	693.851	9.81787	466.394
	1/2L	0.403889	0.0674494	0.123932	5.98803	0.471338	118.489	377.409	20.1138	95.2	64.7131	105	35.6757	34.4288	3.61104	645.125	7.6945	461.082
	1/2L	0.383588	0.110251	0.109458	3.47924	0.493839	108.529	410.209	19.4792	90.676	75.1679	99.375	55.5283	34.4288	1.90524	272.869	9.42274	498.216
	3/4L	0.449756	0.261367	0.118383	1.72078	0.711123	129.497	457.343	8.2826	24.2967	70.4413	75.4167	24.8649	122.066	0.683058	84.4585	6.45319	561.667
	3/4L	0.438966	0.308262	0.0975102	1.42401	0.747228	133.784	424.53	15.9264	58.8571	68.5141	92.0833	4.12776	112.676	1.30097	168.376	6.43485	502.363
	3/4L	0.470816	0.272496	0.114508	1.72779	0.743312	126.466	543.336	15.77	87.715	70.84	83.75	7.27273	117.371	1.67988	223.47	2.63679	458.594

## Sheet: ChlA
		AVERAGE	Change range*	STDEV						Description										ANOVA							Homogeneous subset
			Change rate refers to the amount of change in each treatment compared to the control group.								NUMBER	AVERAGE	STANDARD DEVIATION	STANDARD ERROR	95 % confidence interval of the average		minimum value	maximum value			squares	degrees of freedom	mean square	F	significance				number	1	2	3
															lower limit	upper limit				groups	0.211087	3	0.0703623	578.36	1.08992e-09		tukey Ba	0L	3	0.314452
										0L	3	0.314452	0.0102611	0.00592424	0.288962	0.339942	0.30502	0.325378		intraclass	0.000973268	8	0.000121658					3/4L	3		0.48218
	0L	0.314452	0	0.0102611		CK		1	c	1/4L	3	0.688772	0.00473526	0.0027339	0.677009	0.700535	0.684235	0.693683		sum	0.21206	11						1/2L	3		0.503516
Hedysarum scoparium	1/4L	0.688772	119.039	0.00473526		Root exposure to 2cm depth		2	a	1/2L	3	0.503516	0.00484147	0.00279522	0.491489	0.515543	0.499118	0.508704										1/4L	3			0.688772
	1/2L	0.503516	60.125	0.00484147		Root exposure to 3cm depth		3	b	3/4L	3	0.48218	0.0183162	0.0105748	0.43668	0.52768	0.4627	0.499053
	3/4L	0.48218	53.3398	0.0183162		Root exposure to 5cm depth		4	b	sum	12	0.49723	0.138846	0.0400814	0.409011	0.585449	0.30502	0.693683
Caragana korshinskii	0L	0.69575	0	0.0088068		CK		1	a	Description										ANOVA							Homogeneous subset
	1/4L	0.499825	-28.1603	0.00557319		Root exposure to 2cm depth		2	b		NUMBER	AVERAGE	STANDARD DEVIATION	STANDARD ERROR	95 % confidence interval of the average		minimum value	maximum value			squares	degrees of freedom	mean square	F	significance				number
	1/2L	0.395996	-43.0836	0.0108769		Root exposure to 4cm depth		3	d						lower limit	upper limit				groups	0.152479	3	0.0508264	415.484	4.06006e-09					1	2	3	4
	3/4L	0.453179	-34.8646	0.0161986		Root exposure to 6cm depth		4	c	0L	3	0.69575	0.0088068	0.00508461	0.673872	0.717627	0.686387	0.703869		intraclass	0.000978643	8	0.00012233				tukey Ba	1/2L	3	0.395996
										1/4L	3	0.499825	0.00557319	0.00321768	0.48598	0.513669	0.493447	0.503758		sum	0.153458	11						3/4L	3		0.453179
										1/2L	3	0.395996	0.0108769	0.0062798	0.368976	0.423015	0.383588	0.403889										1/4L	3			0.499825
										3/4L	3	0.453179	0.0161986	0.00935225	0.41294	0.493419	0.438966	0.470816										0L	3				0.69575
										sum	12	0.511187	0.118113	0.0340963	0.436142	0.586233	0.383588	0.703869

## Sheet: ChlB
	叶绿素b
		AVERAGE	Change range	STDEV							Description										ANOVA							Homogeneous subset
												NUMBER	AVERAGE	STANDARD DEVIATION	STANDARD ERROR	95 % confidence interval of the average		minimum value	maximum value			squares	degrees of freedom	mean square	F	significance				number
																lower limit	upper limit				groups	0.152164	3	0.0507212	84.0271	2.17576e-06					1	2	3	4
											0L	3	0.112019	0.00508922	0.00293826	0.0993767	0.124661	0.106668	0.116799		intraclass	0.00482903	8	0.000603629				tukey Ba	0L	3	0.112019
	0L	0.112019	0	0.00508922		CK		1	d		1/4L	3	0.417144	0.0328632	0.0189736	0.335508	0.498781	0.388166	0.452851		sum	0.156993	11						1/2L	3		0.18826
Hedysarum scoparium	1/4L	0.417144	272.387	0.0328632		Root exposure to 2cm depth		2	a		1/2L	3	0.18826	0.0311277	0.0179716	0.110935	0.265586	0.166268	0.223878										3/4L	3			0.25871
	1/2L	0.18826	68.0611	0.0311277		Root exposure to 3cm depth		3	c		3/4L	3	0.25871	0.0184307	0.010641	0.212926	0.304494	0.23783	0.272713										1/4L	3				0.417144
	3/4L	0.25871	130.952	0.0184307		Root exposure to 5cm depth		4	b		sum	12	0.244033	0.119466	0.0344868	0.168129	0.319938	0.106668	0.452851
											Description										ANOVA							Homogeneous subset
Caragana korshinskii	0L	0.322242	0	0.00673552		CK		1	a			NUMBER	AVERAGE	STANDARD DEVIATION	STANDARD ERROR	95 % confidence interval of the average		minimum value	maximum value			squares	degrees of freedom	mean square	F	significance				number
	1/4L	0.297424	-7.70188	0.00863428		Root exposure to 2cm depth		2	a							lower limit	upper limit				groups	0.108	3	0.036	113.761	0					1	2
	1/2L	0.0833076	-74.1475	0.0234552		Root exposure to 4cm depth		3	b		0L	3	0.322242	0.00673552	lower limit	upper limit	0.338974	0.314691	0.32763		intraclass	0.00254083	8	0.000317603				tukey Ba	1/2L	3	0.0833076
	3/4L	0.280708	-12.8891	0.0245021		Root exposure to 6cm depth		4	a		1/4L	3	0.297424	0.00863428	0.00498501	0.275975	0.318872	0.287619	0.303893		sum	0.110933	11						3/4L	3		0.280708
											1/2L	3	0.0833076	0.0234552	0.0135418	0.0250418	0.141573	0.0674494	0.110251										1/4L	3		0.297424
											3/4L	3	0.280708	0.0245021	0.0141463	0.219842	0.341575	0.261367	0.308262										0L	3		0.322242
											sum	12	0.24592	0.100423	0.0289897	0.182115	0.309726	0.0674494	0.32763

## Sheet: ChlA+B
											Description										ANOVA							Homogeneous subset
		AVERAGE	Change range	STDEV								NUMBER	AVERAGE	STANDARD DEVIATION	STANDARD ERROR	95 % confidence interval of the average		minimum value	maximum value			squares	degrees of freedom	mean square	F	significance				number
																lower limit	upper limit				groups	0.704	3	0.234515	439.139	3.25836e-09					1	2	3
											0L	3	0.426471	0.0134445	0.00776	0.3931	0.459869	0.411688	0.437968		intraclass	0.00427227	8	0.000534034				tukey Ba	0L	3	0.426471
											1/4L	3	1.10592	0.0312619	0.0180491	1.02826	1.18358	1.08185	1.14125		sum	0.707818	11						1/2L	3		0.691776
	0L	0.426471	0	0.0134445		CK		1	c		1/2L	3	0.691776	0.0301673	0.0174171	0.616837	0.766716	0.673754	0.726603										3/4L	3		0.74089
Hedysarum scoparium	1/4L	1.10592	159.318	0.0312619		Root exposure to 2cm depth		2	a		3/4L	3	0.74089	0.00824685	0.00476132	0.720404	0.761376	0.735413	0.750375										1/4L	3			1.10592
	1/2L	0.691776	62.2095	0.0301673		Root exposure to 3cm depth		3	b		sum	12	0.741263	0.253667	0.0732275	0.580091	0.902436	0.411688	1.14125
	3/4L	0.74089	73.7258	0.00824685		Root exposure to 5cm depth		4	b
											Description										ANOVA							Homogeneous subset
Caragana korshinskii	0L	1.01799	0	0.00372314		CK		1	a			NUMBER	AVERAGE	STANDARD DEVIATION	STANDARD ERROR	95 % confidence interval of the average		minimum value	maximum value			squares	degrees of freedom	mean square	F	significance		序号		number
	1/4L	0.797248	-21.6842	0.00731496		Root exposure to 2cm depth		2	b							lower limit	upper limit				groups	0.442	3	0.147386	952.68	1.49226e-10					1	2	3	4
	1/2L	0.479303	-52.9168	0.0126078		Root exposure to 4cm depth		3	d		0L	3	1.01799	0.00372314	0.00214956	1.00874	1.02724	1.01402	1.0214		intraclass	0.00123766	8	0.000154707				tukey Ba	1/2L	3	0.479303
	3/4L	0.733888	-27.9083	0.0198117		Root exposure to 6cm depth		4	c		1/4L	3	0.797248	0.00731496	0.00422329	0.779077	0.81542	0.789888	0.804517		sum	0.443397	11						3/4L	3		0.733888
											1/2L	3	0.479303	0.0126078	0.0072791	0.447984	0.510623	0.471338	0.493839										1/4L	3			0.797248
											3/4L	3	0.733888	0.0198117	0.0114383	0.684673	0.783103	0.711123	0.747228										0L	3				1.01799
											sum	12	0.757108	0.20077	0.0579574	0.629544	0.884671	0.471338	1.0214

## Sheet: ChlA÷B
		AVERAGE	Change range	STDEV								Description										ANOVA							Homogeneous subset
													NUMBER	AVERAGE	STANDARD DEVIATION	STANDARD ERROR	95 % confidence interval of the average		minimum value	maximum value			squares	degrees of freedom	mean square	F	significance				number
																	lower limit	upper limit				groups	3.07861	3	1.0262	16.2489	0.001					1	2
												0L	3	2.80964	0.113758	0.0656784	2.52705	3.09223	2.67946	2.89		intraclass	0.505242	8	0.0631553				tukey Ba	1/4L	3	1.65813
	0L	2.80964	0	0.113758		CK			1	a		1/4L	3	1.65813	0.133696	0.0771895	1.32601	1.99025	1.52014	1.79		sum	3.58385	11						3/4L	3	1.87345
Hedysarum scoparium	1/4L	1.65813	-40.9841	0.133696		Root exposure to 2cm depth			2	b		1/2L	3	2.72104	0.423942	0.244763	1.66791	3.77418	2.24554	3.05954										1/2L	3		2.72104
	1/2L	2.72104	-3.1532	0.423942		Root exposure to 3cm depth			2	a		3/4L	3	1.87345	0.205131	0.118432	1.36388	2.38302	1.69666	2.09836										0L	3		2.80964
	3/4L	1.87345	-33.3205	0.205131		Root exposure to 5cm depth			4	b		sum	12	2.26557	0.570793	0.164774	1.9029	2.62823	1.52014	3.05954
Caragana korshinskii	0L	2.16007	0	0.0715497		CK			1	b		Description										ANOVA							Homogeneous subset
	1/4L	1.68167	-22.1476	0.0615474		Root exposure to 2cm depth			2	b			NUMBER	AVERAGE	STANDARD DEVIATION	STANDARD ERROR	95 % confidence interval of the average		minimum value	maximum value			squares	degrees of freedom	mean square	F	significance				number
	1/2L	5.00425	131.67	1.33911		Root exposure to 4cm depth			3	a							lower limit	upper limit				groups	23.3047	3	7.76824	16.9596	0.000791785					1	2
	3/4L	1.62419	-24.8085	0.173403		Root exposure to 6cm depth			4	b		0L	3	2.16007	0.0715497	0.0413093	1.98234	2.33781	2.09501	2.2367		intraclass	3.66436	8	0.458045				tukey Ba	3/4L	3	1.62419
												1/4L	3	1.68167	0.0615474	0.0355344	1.52878	1.83456	1.62375	1.7463		sum	26.9691	11						1/4L	3	1.68167
												1/2L	3	5.00425	1.33911	0.773133	1.67772	8.33077	3.47924	5.98803										0L	3	2.16007
												3/4L	3	1.62419	0.173403	0.100114	1.19344	2.05495	1.42401	1.72779										1/2L	3		5.00425
												sum	12	2.61755	1.5658	0.452008	1.62268	3.61241	1.42401	5.98803

## Sheet: Chlx·C
		AVERAGE	Change range	STDEV							Description										ANOVA							Homogeneous subset
												NUMBER	AVERAGE	STANDARD DEVIATION	STANDARD ERROR	95 % confidence interval of the average		minimum value	maximum value			squares	degrees of freedom	mean square	F	significance				number
																lower limit	upper limit				groups	0.00319326	3	0.00106442	5.66135	0.0222992					1	2
											0L	3	0.104723	0.00355737	0.00205385	0.0958864	0.11356	0.100622	0.106969		intraclass	0.00150412	8	0.000188015				tukey Ba	1/4L	3	0.0983026
	0L	0.104723	0	0.00355737		CK					1/4L	3	0.0983026	0.0163089	0.00941597	0.0577889	0.138816	0.0797878	0.11054		sum	0.00469738	11						0L	3	0.104723	0.104723
Hedysarum scoparium	1/4L	0.0983026	-6.13126	0.0163089		Root exposure to 2cm depth		1	ab		1/2L	3	0.136975	0.016202	0.00935423	0.0967272	0.177223	0.120954	0.153352										3/4L	3	0.129884	0.129884
	1/2L	0.136975	30.7971	0.016202		Root exposure to 3cm depth		2	b		3/4L	3	0.129884	0.0145231	0.00838491	0.0938064	0.165961	0.114581	0.143476										1/2L	3		0.136975
	3/4L	0.129884	24.0255	0.0145231		Root exposure to 5cm depth		3	a		sum	12	0.117471	0.0206648	0.00596542	0.104341	0.130601	0.0797878	0.153352
								4	ab
Caragana korshinskii	0L	0.193835	0	0.0022608		CK		1	a		Description										ANOVA							Homogeneous subset
	1/4L	0.0977619	-49.5645	0.00410158		Root exposure to 2cm depth		2	c			NUMBER	AVERAGE	STANDARD DEVIATION	STANDARD ERROR	95 % confidence interval of the average		minimum value	maximum value			squares	degrees of freedom	mean square	F	significance				number
	1/2L	0.118699	-38.763	0.00802628		Root exposure to 4cm depth		3	b							lower limit	upper limit				groups	0.0169098	3	0.0056366	107.559	8.3484e-07					1	2	3
	3/4L	0.110133	-43.182	0.0111024		Root exposure to 6cm depth		4	bc		0L	3	0.193835	0.0022608	0.00130527	0.188219	0.199452	0.191631	0.196149		intraclass	0.000419238	8	5.24048e-05				tukey Ba	1/4L	3	0.0977619
											1/4L	3	0.0977619	0.00410158	0.00236805	0.087573	0.107951	0.095355	0.102498		sum	0.017329	11						3/4L	3	0.110133	0.110133
											1/2L	3	0.118699	0.00802628	0.00463398	0.0987606	0.138637	0.109458	0.123932										1/2L	3		0.118699
											3/4L	3	0.110133	0.0111024	0.00640999	0.0825535	0.137713	0.0975102	0.118383										0L	3			0.193835
											sum	12	0.130107	0.0396909	0.0114578	0.104889	0.155326	0.095355	0.196149

## Sheet: Pro
		AVERAGE	Change range	STDEV						Description										ANOVA							Homogeneous subset
											NUMBER	AVERAGE	STANDARD DEVIATION	STANDARD ERROR	95 % confidence interval of the average		minimum value	maximum value			squares	degrees of freedom	mean square	F	significance				number
															lower limit	upper limit				groups	6019.43	3	2006.48	56.4678	9.9915e-06					1	2	3
										0L	3	67.529	8.47043	4.8904	46.4873	88.5707	58.379	75.0967		intraclass	284.265	8	35.5331				tukey Ba	3/4L	3	51.9191
	0L	67.529	0	8.47043		CK		1	b	1/4L	3	112.265	5.10879	2.94956	99.5745	124.956	109.217	118.163		sum	6303.7	11						0L	3		67.529
Hedysarum scoparium	1/4L	112.265	66.2477	5.10879		Root exposure to 2cm depth		2	a	1/2L	3	69.5569	4.39545	2.53771	58.638	80.4758	64.9156	73.6562										1/2L	3		69.5569
	1/2L	69.5569	3.00298	4.39545		Root exposure to 3cm depth		3	b	3/4L	3	51.9191	4.99647	2.88471	39.5072	64.331	47.3701	57.2668										1/4L	3			112.265
	3/4L	51.9191	-23.1159	4.99647		Root exposure to 5cm depth		4	c	sum	12	75.3176	23.9387	6.91052	60.1076	90.5276	47.3701	118.163
Caragana korshinskii	0L	112.243	0	7.00534		CK		1	b	Description										ANOVA							Homogeneous subset
	1/4L	116.541	3.82946	2.41389		Root exposure to 2cm depth		2	b		NUMBER	AVERAGE	STANDARD DEVIATION	STANDARD ERROR	95 % confidence interval of the average		minimum value	maximum value			squares	degrees of freedom	mean square	F	significance				number
	1/2L	113.177	0.832644	5.01282		Root exposure to 4cm depth		3	b						lower limit	upper limit				groups	601.529	3	200.51	8.57343	0.00701569					1	2
	3/4L	129.915	15.7452	3.67684		Root exposure to 6cm depth		4	a	0L	3	112.243	7.00534	4.04454	94.8404	129.645	105.593	119.557		intraclass	187.099	8	23.3873				tukey Ba	0L	3	112.243
										1/4L	3	116.541	2.41389	1.39366	110.544	122.537	114.351	119.129		sum	788.627	11						1/2L	3	113.177
										1/2L	3	113.177	5.01282	2.89415	100.725	125.63	108.529	118.489										1/4L	3	116.541
										3/4L	3	129.915	3.67684	2.12283	120.782	139.049	126.466	133.784										3/4L	3		129.915
										sum	12	117.969	8.4672	2.44427	112.589	123.349	105.593	133.784

## Sheet: SSC
											Description										ANOVA							Homogeneous subset
		AVERAGE	Change range	STDEV								NUMBER	AVERAGE	STANDARD DEVIATION	STANDARD ERROR	95 % confidence interval of the average		minimum value	maximum value			squares	degrees of freedom	mean square	F	significance				number
																lower limit	upper limit				groups	35995.7	3	11998.6	10.8544	0.00341636					1	2
											0L	3	299.12	41.599	24.0172	195.782	402.458	260.551	343.2		intraclass	8843.25	8	1105.41				tukey Ba	1/2L	3	177.654
											1/4L	3	182.799	28.0112	16.1723	113.215	252.383	154.788	210.81		sum	44838.9	11						1/4L	3	182.799
	0L	299.12	0	41.599	a	CK			1	a	1/2L	3	177.654	15.5097	8.95455	139.125	216.182	164.454	194.736										3/4L	3		278.298
Hedysarum scoparium	1/4L	182.799	-38.8877	28.0112	b	Root exposure to 2cm depth			2	b	3/4L	3	278.298	40.8163	23.5653	176.905	379.692	236.303	317.823										0L	3		299.12
	1/2L	177.654	-40.608	15.5097	b	Root exposure to 3cm depth			3	b	sum	12	234.468	63.8456	18.4306	193.902	275.033	154.788	343.2
	3/4L	278.298	-6.96102	40.8163	a	Root exposure to 5cm depth			4	a
											Description										ANOVA							Homogeneous subset
Caragana korshinskii	0L	357.579	0	6.96921	d	CK			1	c		NUMBER	AVERAGE	STANDARD DEVIATION	STANDARD ERROR	95 % confidence interval of the average		minimum value	maximum value			squares	degrees of freedom	mean square	F	significance				number
	1/4L	554.433	55.0519	22.2835	a	Root exposure to 2cm depth			2	a						lower limit	upper limit				groups	69427.7	3	23142.6	20.2188	0.000431981					1	2	3
	1/2L	393.809	10.132	16.4002	c	Root exposure to 4cm depth			3	c	0L	3	357.579	6.96921	4.02368	340.267	374.892	352.52	365.528		intraclass	9156.85	8	1144.61				tukey Ba	0L	3	357.579
	3/4L	475.07	32.8573	61.3542	b	Root exposure to 6cm depth			4	b	1/4L	3	554.433	22.2835	12.8654	499.078	609.788	536.938	579.521		sum	78584.6	11						1/2L	3	393.809
											1/2L	3	393.809	16.4002	9.46864	353.069	434.549	377.409	410.209										3/4L	3		475.07
											3/4L	3	475.07	61.3542	35.4229	322.657	627.482	424.53	543.336										1/4L	3			554.433
											sum	12	445.223	84.5225	24.3995	391.52	498.926	352.52	579.521

## Sheet: MDA
											Description											ANOVA							Homogeneous subset
		AVERAGE	Change range	STDEV								NUMBER	AVERAGE	STANDARD DEVIATION	STANDARD ERROR	95 % confidence interval of the average		minimum value	maximum value				squares	degrees of freedom	mean square	F	significance				number
																lower limit	upper limit					groups	158.706	3	52.902	4.91471	0.0319077					1	2
											0L	3	14.7311	3.21033	1.85349	6.75622	22.706	11.1312	17.297			intraclass	86.1122	8	10.764				tukey Ba	0L	3	14.7311
											1/4L	3	15.0314	1.32643	0.765814	11.7364	18.3264	13.5878	16.1964			sum	244.818	11						1/4L	3	15.0314
	0L	14.7311	0	3.21033		CK			1	b	1/2L	3	23.7845	5.38878	3.11122	10.398	37.1709	20.4378	30.0008											3/4L	3	17.977	17.977
Hedysarum scoparium	1/4L	15.0314	2.03831	1.32643		Root exposure to 2cm depth			2	b	3/4L	3	17.977	1.39694	0.806525	14.5068	21.4472	16.365	18.8334											1/2L	3		23.7845
	1/2L	23.7845	61.4571	5.38878		Root exposure to 3cm depth			3	a	sum	12	17.881	4.71765	1.36187	14.8835	20.8785	11.1312	30.0008
	3/4L	17.977	22.0341	1.39694		Root exposure to 5cm depth			4	ab
											Description											ANOVA							Homogeneous subset
Caragana korshinskii	0L	14.0448	0	0.453994		CK			1	a		NUMBER	AVERAGE	STANDARD DEVIATION	STANDARD ERROR	95 % confidence interval of the average		minimum value	maximum value				squares	degrees of freedom	mean square	F	significance
	1/4L	16.9799	20.8979	3.24855		Root exposure to 2cm depth			2	a						lower limit	upper limit					groups	86.0781	3	28.6927	3.79756	0.0582657					1
	1/2L	20.1003	43.1154	0.614412		Root exposure to 4cm depth			3	a	0L	3	14.0448	0.453994	0.262114	12.917	15.1726	13.7608	14.5684			intraclass	60.4445	8	7.55556				tukey Ba	3/4L	3	13.3263
	3/4L	13.3263	-5.11554	4.3687		Root exposure to 6cm depth			4	a	1/4L	3	16.9799	3.24855	1.87555	8.91002	25.0497	13.2938	19.4252			sum	146.523	11						0L	3	14.0448
											1/2L	3	20.1003	0.614412	0.354731	18.574	21.6266	19.4792	20.7078											1/4L	3	16.9799
											3/4L	3	13.3263	4.3687	2.52227	2.47388	24.1788	8.2826	15.9264											1/2L	3	20.1003
											sum	12	16.1128	3.64969	1.05357	13.7939	18.4317	8.2826	20.7078

## Sheet: MP
										Description										ANOVA							Homogeneous subset
		AVERAGE	Change range	STDEV							NUMBER	AVERAGE	STANDARD DEVIATION	STANDARD ERROR	95 % confidence interval of the average		minimum value	maximum value			squares	degrees of freedom	mean square	F	significance				number
															lower limit	upper limit				groups	770.695	3	256.898	0.960189	0.457029					1
										0L	3	49.782	10.8849	6.28442	22.7423	76.8217	37.6387	58.6622		intraclass	2140.4	8	267.55				tukey Ba	1/4L	3	34.9645
										1/4L	3	34.9645	7.31533	4.2235	16.7923	53.1368	27.2883	41.8557		sum	2911.09	11						3/4L	3	45.3605
	0L	49.782	0	10.8849		CK		1	a	1/2L	3	57.0886	18.4839	10.6717	11.172	103.005	36.5135	72.2908										0L	3	49.782
Hedysarum scoparium	1/4L	34.9645	-29.7647	7.31533		Root exposure to 2cm depth		2	a	3/4L	3	45.3605	23.5912	13.6204	-13.2435	103.964	22.794	69.8578										1/2L	3	57.0886
	1/2L	57.0886	14.6772	18.4839		Root exposure to 3cm depth		3	a	sum	12	46.7989	16.2679	4.69614	36.4628	57.135	22.794	72.2908
	3/4L	45.3605	-8.8818	23.5912		Root exposure to 5cm depth		4	a
										Description										ANOVA							Homogeneous subset
											NUMBER	AVERAGE	STANDARD DEVIATION	STANDARD ERROR	95 % confidence interval of the average		minimum value	maximum value			squares	degrees of freedom	mean square	F	significance				number
Caragana korshinskii	0L	72.6277	0	6.49179		CK		1	a						lower limit	upper limit				groups	971.264	3	323.755	0.666183	0.59598					1
	1/4L	59.9783	-17.4167	17.2783		Root exposure to 2cm depth		2	a	0L	3	72.6277	6.49179	3.74804	56.5012	88.7542	66.8904	79.6743		intraclass	3887.88	8	485.985				tukey Ba	3/4L	3	56.9563
	1/2L	78.9147	8.65656	24.3941		Root exposure to 4cm depth		3	a	1/4L	3	59.9783	17.2783	9.97565	17.0566	102.9	40.5615	73.6592		sum	4859.14	11						1/4L	3	59.9783
	3/4L	56.9563	-21.5777	31.7519		Root exposure to 6cm depth		4	a	1/2L	3	78.9147	24.3941	14.084	18.3163	139.513	50.8682	95.2										0L	3	72.6277
										3/4L	3	56.9563	31.7519	18.3319	-21.9197	135.832	24.2967	87.715										1/2L	3	78.9147
										sum	12	67.1192	21.0176	6.06726	53.7653	80.4732	24.2967	95.2

[truncated: 8 more sheets: POD, CAT, SOD, RV, Tr, Gs, Pn, Ci]
